# Supplementary material
Source: PubMed Central journal article supplement (PMC2149905)
Supplement: NIHMS30540-supplement-supp.pdf [file NIHMS30540-supplement-supp.pdf]

|   |     |                  |                 |                  |                  |                  |                  |     |
|---|-----|------------------|-----------------|------------------|------------------|------------------|------------------|-----|
|   | 1   | 15               | 30              | 45               | 60               | 75               | 90               |     |
| 1 | H.s | ----MSLADELLADL  | EEAEEEEEGGSYGEE | -----EEE         | PAIEDVQEETQLDLS  | -----            | --GDSVKTIAKLWDS  | 57  |
| 2 | S.p | ----MSLADELLADL  | DDIEETTESTITDEL | GPDAKKRRLELQLEE  | GNGISAELENDLDIT  | KISDSAQKLPSEVAN  | KFNDNNENIYQLLNS  | 86  |
| 3 | S.c | MSSEEDYFDELEYDL  | ADEVNEEKEDIQTKK | LTTVNCQTEKFNPFEE | ILPESIELFRTLALI  | S-----           | -----PDRLSL      | 67  |
|   | 91  | 105              | 120             | 135              | 150              | 165              | 180              |     |
| 1 | H.s | KMFAEIMMKIEEYIS  | KQAKASEVMGPVEAA | PEYRVIVDANNLTVE  | IENELNIIHKFIRDK  | YSKRFPELESIVPNA  | LDYIRTVKELGNSLD  | 147 |
| 2 | S.p | TRLRDIIEGTEKYKG  | TEKQA--ITGNIEDD | LEYHLIVDSNSIAME  | IDDEILRLHRLVKEW  | YHDRFPELSSLVLNA  | FDYCKTVSSLLNDLD  | 174 |
| 3 | S.c | SETAQILPKIVDLKR  | ILQQQ-----EI    | DFIKLLPFFNEIIPL  | IKSNIKLMHNFLISL  | YSRRFPELSSLIPSP  | LQYSKVISILENENY  | 149 |
|   | 181 | 195              | 210             | 225              | 240              | 255              | 270              |     |
| 1 | H.s | KCKNNE-----N     | LQQILT NATIMVVS | TASTTQGGQLSEEEL  | ERLEEACDMALELNA  | SKHRIY EYVESRMSF | IAPNLSIII GASTAA | 229 |
| 2 | S.p | NSK-----T        | KLSFLPSATVMVIAT | TATTTVGKPLPDEMI  | KNVKNCC EAIQQLGE | EKQKIIEYVQSRISV  | VAPNLSAVVGSTTAA  | 253 |
| 3 | S.c | SKNESDELFFHLENK  | AKLTREQILVLTMSM | KTSFKNKEPLDIKTR  | TQILEANSILENLWK  | LQEDIGQYIASKISI  | IAPNVCFLVGPEIAA  | 239 |
|   | 271 | 285              | 300             | 315              | 330              | 345              | 360              |     |
| 1 | H.s | KIMGVAAGGLTNLSKM | PACNIMLLGAQRKTL | SGFSSTSVLP-HTGY  | IYHSDIVQSLPPDLR  | RKAARLVAAKCTLAA  | RVDSFHSTEG--KV   | 316 |
| 2 | S.p | NLIGIAGGLTRLGKF  | PACNLPALGKRRLLT | IGINNPVAVSG-DYGF | LYMSEIVQKTPPDVR  | KQAIRMTAAKVALAA  | RIDSIHEYDPG--SF  | 340 |
| 3 | S.c | QLIAHAGGVLEFSRI  | PSCNIASIGKNKHL  | HELHTLESGVRQEGY  | LFASDMIQKFPVSVH  | KQMLRMLCAKVSLAA  | RVDAGQKNGDRNTVL  | 329 |
|   | 361 | 375              | 390             | 405              | 420              | 435              | 450              |     |
| 1 | H.s | GYELKDEIERKFDKW  | QEPPPVKQVKPLPAP | LDGQRKKRGRRYRK   | MKERLGLTEIRKQAN  | RMSFGEIEEDAYQ-E  | DLGFSLGHLGKSGSG  | 405 |
| 2 | S.p | GISARKEVERKIEKL  | LEPPSQKPTVALPVP | DDRPKRRRGRRIRK   | MKEQYAVTELRRLQN  | RVAFGKEEAEVFN-F  | DETEGLGMLGQEGEG  | 429 |
| 3 | S.c | AHKWKAELSKKARKL  | SEAPSISETKALPIP | ETNPKRKELGENLGS  | TRKNSDYRMSDNYKI  | GWNLAKQEQTVLDSY  | GEEVGLGMSNTSLQQ  | 419 |
|   | 451 | 465              | 480             | 495              | 510              | 525              | 540              |     |
| 1 | H.s | RVRQTQVNEATKARI  | SKTLQRTLQKQSVVY | GGKSTIRDRSSGTAS  | SVAFTPLQGLEIVNP  | QAAEKKVAEANQKYF  | SS--MAEFLKVKGEK  | 493 |
| 2 | S.p | KIRAVSIDSRTKLRL  | PKARKAQLQSMQKN  | P-----LAASGLQS   | SLSFTPIQGIELVNP  | LLQRQQKVEEANKWF  | RDGVFTQIKKDSNEP  | 513 |
| 3 | S.c | AVGATSGSRRSAGNQ  | AKLTKVMKHRISEAN | QQ----ADEFLLISLG | HNTEQPNLSP EMVQM | HKKQHTNPEEETNWF  | SG---HG-----     | 494 |
|   | 541 | 555              |                 |                  |                  |                  |                  |     |
| 1 | H.s | SGLMST           | 499             |                  |                  |                  |                  |     |
| 2 | S.p | KNKFS-           | 518             |                  |                  |                  |                  |     |
| 3 | S.c | -----            | 494             |                  |                  |                  |                  |     |
